# Supplementary material for: Construction of a linkage map based on retrotransposon insertion polymorphisms in sweetpotato via high-throughput sequencing
Source: PubMed Central journal article supplement — Breed Sci. 2015 Mar 1;65(2):145–53. doi: 10.1270/jsbbs.65.145 (PMC4430505; doi:10.1270/jsbbs.65.145), 2015-03-01
Supplement: 65_145_2.pdf [file 65_145_2.pdf]

**Supplemental Table 1.** Adapter and primer sequences used in this study

| Primer name           | Primer sequence (5' to 3')                                              |
|-----------------------|-------------------------------------------------------------------------|
| Forked_Type1          | AATAGGGCTCGAGCGGCAGCTATTAATAGTACT                                       |
| Forked_Com            | GTACTATTAATAGCATCTTCGTTTCGTCGAT                                         |
| AP2                   | AATAGGGCTCGAGCGGC                                                       |
| <i>Rtsp-1</i> _ppt    | ATCTAATCTTCAAGTGGGAGATTGTCCG                                            |
| D501                  | aatgatacggcgaccaccgagatctacac <u>TATAGCCTTATCCCACTTCCGCGGGCGCAACA</u>   |
| D502                  | aatgatacggcgaccaccgagatctacac <u>ATAGAGGCTATCCCACTTCCGCGGGCGCAACA</u>   |
| D503                  | aatgatacggcgaccaccgagatctacac <u>CCTATCCTTATCCCACTTCCGCGGGCGCAACA</u>   |
| D504                  | aatgatacggcgaccaccgagatctacac <u>GGCTCTGATATCCCACTTCCGCGGGCGCAACA</u>   |
| D505                  | aatgatacggcgaccaccgagatctacac <u>AGGCGAAGTATCCCACTTCCGCGGGCGCAACA</u>   |
| D506                  | aatgatacggcgaccaccgagatctacac <u>TAATCTTATATCCCACTTCCGCGGGCGCAACA</u>   |
| D507                  | aatgatacggcgaccaccgagatctacac <u>CAGGACGTTATCCCACTTCCGCGGGCGCAACA</u>   |
| D508                  | aatgatacggcgaccaccgagatctacac <u>GTA CTGACTATCCCACTTCCGCGGGCGCAACA</u>  |
| D509                  | aatgatacggcgaccaccgagatctacac <u>TAGATCGCTATCCCACTTCCGCGGGCGCAACA</u>   |
| D510                  | aatgatacggcgaccaccgagatctacac <u>CTCTCTATTATCCCACTTCCGCGGGCGCAACA</u>   |
| D701                  | caagcagaagacggcatacagagat <u>CGAGTAATGGGCTCGAGCGGCAGCTATTAATAGTACT</u>  |
| D702                  | caagcagaagacggcatacagagat <u>TCTCCGAGGGCTCGAGCGGCAGCTATTAATAGTACT</u>   |
| D703                  | caagcagaagacggcatacagagat <u>AATGAGCGGGCTCGAGCGGCAGCTATTAATAGTACT</u>   |
| D704                  | caagcagaagacggcatacagagat <u>GGAATCTCGGGCTCGAGCGGCAGCTATTAATAGTACT</u>  |
| D705                  | caagcagaagacggcatacagagat <u>TTCTGAATGGGCTCGAGCGGCAGCTATTAATAGTACT</u>  |
| D706                  | caagcagaagacggcatacagagat <u>ACGAATTCGGGCTCGAGCGGCAGCTATTAATAGTACT</u>  |
| D707                  | caagcagaagacggcatacagagat <u>AGCTTCAGGGGCTCGAGCGGCAGCTATTAATAGTACT</u>  |
| D708                  | caagcagaagacggcatacagagat <u>GCGCATTAGGGGCTCGAGCGGCAGCTATTAATAGTACT</u> |
| D709                  | caagcagaagacggcatacagagat <u>CATAGCCGGGCTCGAGCGGCAGCTATTAATAGTACT</u>   |
| D710                  | caagcagaagacggcatacagagat <u>TTCGCGGAGGGGCTCGAGCGGCAGCTATTAATAGTACT</u> |
| D711                  | caagcagaagacggcatacagagat <u>GCGCGAGAGGGGCTCGAGCGGCAGCTATTAATAGTACT</u> |
| D712                  | caagcagaagacggcatacagagat <u>CTATCGCTGGGCTCGAGCGGCAGCTATTAATAGTACT</u>  |
| Positive_control_F    | CTAAAGACAGCTGACCGTGTAGTC                                                |
| Positive_control_R    | TACTGAGAAACCAACCCATCCTC                                                 |
| <i>Rtsp-1</i> _LTR_D1 | CTCCTTGTTAGTTAGAGAGTGGTTG                                               |
| MiSeq_C1260           | GCTCCGGTGTGGAGGAGAA                                                     |
| MiSeq_C134            | CAGGTGGCATATTTTGCTCC                                                    |

Underlined sequences represent barcode sequences.

Lower-case letters in D501–D510 and D701–D712 indicate P5 and P7 sequences, respectively.

**Supplemental Table 2.** The information of primer combinations and the number of reads in each sample

| Cultivar/strain | Primer (P5) | Primer (P7) | No. of reads | Cultivar/strain | Primer (P5) | Primer (P7) | No. of reads |
|-----------------|-------------|-------------|--------------|-----------------|-------------|-------------|--------------|
| PSL_1           | D501        | D701        | 238,064      | PI68            | D505        | D705        | 165,479      |
| 90IDN-47_1      | D501        | D702        | 226,600      | PI69            | D505        | D706        | 151,598      |
| PI1             | D501        | D703        | 212,457      | PI71            | D505        | D707        | 148,731      |
| PI2             | D501        | D704        | 229,576      | PI72            | D505        | D708        | 123,313      |
| PI5             | D501        | D705        | 195,276      | PI73            | D505        | D709        | 114,233      |
| PI7             | D501        | D706        | 237,063      | PI74            | D505        | D710        | 138,183      |
| PI8             | D501        | D707        | 257,671      | PI76            | D505        | D711        | 127,808      |
| PI9             | D501        | D708        | 197,683      | PI77            | D505        | D712        | 128,497      |
| PI11            | D501        | D709        | 174,310      | PI79            | D506        | D701        | 141,783      |
| PI12            | D501        | D710        | 185,259      | PI80            | D506        | D702        | 152,814      |
| PI13            | D501        | D711        | 190,618      | PI82            | D506        | D703        | 121,206      |
| PI14            | D501        | D712        | 218,276      | PI84            | D506        | D704        | 164,999      |
| PI15            | D502        | D701        | 168,387      | PI85            | D506        | D705        | 168,777      |
| PI17            | D502        | D702        | 176,299      | PI86            | D506        | D706        | 135,781      |
| PI18            | D502        | D703        | 239,500      | PI87            | D506        | D707        | 157,138      |
| PI20            | D502        | D704        | 225,316      | PI88            | D506        | D708        | 218,168      |
| PI22            | D502        | D705        | 228,215      | PI89            | D506        | D709        | 189,224      |
| PI23            | D502        | D706        | 218,067      | PI91            | D506        | D710        | 168,218      |
| PI24            | D502        | D707        | 207,092      | PI92            | D506        | D711        | 133,059      |
| PI25            | D502        | D708        | 182,518      | PI94            | D506        | D712        | 124,947      |
| PI26            | D502        | D709        | 180,429      | PI95            | D507        | D701        | 170,964      |
| PI27            | D502        | D710        | 158,437      | PI96            | D507        | D702        | 119,757      |
| PI29            | D502        | D711        | 158,285      | PI97            | D507        | D703        | 158,211      |
| PI30            | D502        | D712        | 147,210      | PI98            | D507        | D704        | 184,843      |
| PI31            | D503        | D701        | 121,908      | PI99            | D507        | D705        | 126,890      |
| PI32            | D503        | D702        | 140,411      | PI100           | D507        | D706        | 107,261      |
| PI33            | D503        | D703        | 211,697      | PI101           | D507        | D707        | 113,460      |
| PI34            | D503        | D704        | 148,569      | PI102           | D507        | D708        | 118,768      |
| PI36            | D503        | D705        | 201,291      | PI103           | D507        | D709        | 104,860      |
| PI37            | D503        | D706        | 185,541      | PI104           | D507        | D710        | 126,564      |
| PI38            | D503        | D707        | 185,225      | PI105           | D507        | D711        | 117,598      |
| PI39            | D503        | D708        | 153,394      | PI106           | D507        | D712        | 103,502      |
| PI41            | D503        | D709        | 186,715      | PI107           | D508        | D701        | 160,023      |
| PI43            | D503        | D710        | 149,488      | PI108           | D508        | D702        | 133,796      |
| PI45            | D503        | D711        | 126,393      | PI109           | D508        | D703        | 108,676      |
| PI46            | D503        | D712        | 132,339      | PI110           | D508        | D704        | 114,458      |
| PI47            | D504        | D701        | 242,624      | PI111           | D508        | D705        | 153,238      |
| PI49            | D504        | D702        | 187,250      | PI112           | D508        | D706        | 136,558      |
| PI50            | D504        | D703        | 165,582      | PI113           | D508        | D707        | 104,959      |
| PI51            | D504        | D704        | 196,465      | PI114           | D508        | D708        | 145,806      |
| PI52            | D504        | D705        | 181,130      | PI115           | D508        | D709        | 117,505      |
| PI54            | D504        | D707        | 163,935      | PI116           | D508        | D710        | 122,826      |
| PI55            | D504        | D708        | 140,724      | PI117           | D508        | D711        | 120,515      |
| PI56            | D504        | D709        | 141,051      | PI118           | D508        | D712        | 111,280      |
| PI57            | D504        | D710        | 123,064      | PI119           | D509        | D701        | 122,629      |
| PI59            | D504        | D711        | 128,800      | PI120           | D509        | D702        | 143,255      |
| PI60            | D504        | D712        | 145,246      | PI121           | D509        | D703        | 132,041      |
| PI61            | D505        | D701        | 136,148      | PI122           | D509        | D704        | 137,956      |
| PI62            | D505        | D702        | 127,131      | PI123           | D510        | D705        | 129,864      |
| PI63            | D505        | D703        | 164,228      | PSL_2           | D510        | D706        | 239,430      |
| PI64            | D505        | D704        | 135,554      | 90IDN-47_2      | D510        | D707        | 251,504      |

**Supplemental Table 3.** The information of marker sequences in linkage maps

| Marker name | Sequence information                                |
|-------------|-----------------------------------------------------|
| Cl100s      | GCTAAAACCGAAGGCGCCAACAGAAATGCAACGATCACACTGTGAAAAC   |
| Cl102s      | GTGCATAGTCAAGATTGAATATTCAATGAATTTATGGAAATTTGGAAAGG  |
| Cl105s      | GTCTTGAGGTACATCAAGCCTGGACAAGGGTTGTTTTATTAGGCTTCTTC  |
| Cl106s      | GTCTGGAGGATAAGATTGGGAAACTTGAAGCGGCTGAGGCAAATGACA    |
| Cl108s      | GTCCAAATGAACCACAGCGTGCATACAATCACAGTCTAACCTTGGCGC    |
| Cl109s      | GTCAAGTCTATGCTCCACCAAGTTTTCTTGAGATAATGATGAAAGAGCT   |
| Cl111s      | GTATATGCTACGGAATGGACATACTATTGTTTGGTTCTCGACAGCAGAAG  |
| Cl112s      | GTATAGTATAACCATAGTTTCATCCACCCACCATGTCTGAACAAGTTTCA  |
| Cl113s      | GTAACAATTGAGCGCGGCAATCCTCTGCATTCTCAACAAGATGCTTTGC   |
| Cl114s      | GTAACAACATTCTCATAGGTTGTAGGAATAATATTGTTTTTGAGAGCAA   |
| Cl115s      | GGTTTCACAGAGCAGCGAACCTCCTCCTCTACAGTGGAAAGGATAAC     |
| Cl117s      | GGTGCTTGACAGTGAATCAAGTGGCAATGCTACAAATGCTAGCCACACTC  |
| Cl118s      | GGCCGAACGGTATTATAATGAGATGAAGCCCAATGGTTTCTTTGAATT    |
| Cl120s      | GGATTCGCCATCCCTGCTTGGCAAGCAGGGCAACATTAATAATCGCGTAA  |
| Cl121ds     | ACTCCTTTAGACCTTAGTGTGAGGCATTTCCACCCAAAACCTTGGTTCC   |
| Cl123s      | GGAGTGTGATCAACTATGAGCAATCTAGACTACTTTAGCCATTTCTGAT   |
| Cl124s      | GGACCAAGACATTAGACTTCAAACCTGTTAAAGTCATCATTCAATCCTTGC |
| Cl125s      | GGAAGAATCCCTGAATCGGGCAGAGCTGAGTCTATACTAGTCTAAATTAG  |
| Cl126s      | GGAACAACAATGAACAAATATAATTTGCTATGCAAAATAAAATAAAGTT   |
| Cl127s      | ACCTCTTGAATGAAACCATCCATTTCTGTGAATGGCATGGTGTTTGTG    |
| Cl128s      | ACAGTTACCTTTTAAAGTTGTGACCAAAGGGTCCATAGGTGGCCTTGTA   |
| Cl129s      | GCTTGGTGGCCGACGCGACGTGTAACCGGGGAAAGACCAATTCAAGCCGT  |
| Cl130s      | GCGGCAACCATCCATGCATCTGAAACCAACTTTGGAATTGGAATCCAAAG  |
| Cl133s      | GCCCTTTAAGCATTCAAAAATTAATGCACATTCAAAATTTCTAAGACTTT  |
| Cl135s      | GCAATGCGTCTTTGAACCCGGACATGCGTCTTTTTGGACCAAGATTCCG   |
| Cl136s      | GATGGCTCCCACGGTCGGGCGAAGTAAAGGAAGTTTACATATGAGAAACC  |
| Cl137ds     | GATATGATGTTCTGCAGTGCATATACACTTTTGAGCTAAAGAAAATGAG   |
| Cl138s      | GATATGGTGGGACATCTATGTGACTTTGGTGTGCAAAGCTCTTAGGAGA   |
| Cl139s      | GATATCATAGATTTTTCTCAAATCTTTGATAATGCTTGCATTTAATCTT   |
| Cl13s       | AAAAAGAGATAACACAGTATACCAACTGCATATTTCTCTTGTGGACGGAG  |
| Cl141s      | GAGAGCAAGGCCAAGACGGATTGGATGAGTGGAAGCAAGTTCTGTGCTAG  |
| Cl142s      | GACCTGTCCATGGGCAACAGGCTAAGGGGAGAGCTCTTTGCGTGACGTACG |
| Cl143ds     | GACCCGACTCATGGTGAGACGGTCTCACACAAGTTTTTGCCTTTATAAAG  |
| Cl145s      | GAAGTGAGCATAACCAACAAGCAATGATGAATCTTGAATTTACCTTATTA  |
| Cl147s      | GAACTAGTAGTTTATAAACATTAAGCTTTGAATTTATGAACACATAACA   |
| Cl148s      | GAAATTAAGGCAAGCAAACATTAATTTGCGTACATACTTACAGACTTT    |
| Cl14ds      | AAAAAACTAATTGTATGTTTATACAATTTGAAAACAAAGAGTAAAAAAT   |
| Cl150s      | GAAATGAGGATGTTCTAGGAATATTCCCTTTCTGGAGTTATATATTGCCA  |
| Cl151s      | GAAATCTGTATGGCTTCCAACCGTTCCTACTAATGCGCAAAACATGGTTC  |
| Cl152s      | CAAATACAATCGACGTCTTAACGCTATGCTTCCATCATTTACGTACAT    |
| Cl153s      | GAAACTACCTAGCTTTCAAAGTTTCAAAAACCTTCAAAAATTGTAAGCAT  |
| Cl15s       | TTTTTGTGCTGCTTCATCCAGCCCACCTTCGACGGTTTTGGGCCACTGAT  |
| Cl160s      | CTCGGCACCTTAACAAATCTTCAAAGTATTCATTTTTCTCGCAACAACCT  |
| Cl161s      | CTATCAGAGTTGATTTGAGGTGGGACTTAAAGTGTGGAGGTGTATGCAC   |
| Cl166s      | CTCTGAACTAACTTTATAAATTGTTATTTGCTGTCCAGAGTTGGCATAAG  |
| Cl167s      | CTCTGGATTCAAATTTGACTTCATCATTAGCACGATCCAAATTCGCACTG  |
| Cl168s      | CTCCTGTGGCAAGCAGTGACATAGCACCATCAGAGGCAGTGCCTCTGGAA  |
| Cl169ds     | TCCCTGACAAGTGATGTGAGTTTATATCTGTTGGCATGAAAAGAAAACAA  |
| Cl170s      | CTCCAAGCCACTCACAACAGGCCTATTAATGAGTGGTAATAGAGATT     |
| Cl173s      | CTACATAGCACCAGAAGTCTTCTCAGCAATTTGGGAATGCTCGTATA     |
| Cl174s      | CTAATTCACCCTTGATGGTCTTTTTGAGTTATACTTTTACACATCAAGTG  |
| Cl176s      | CGTTGTACCCTATGTTTTCCATGATAAAAATAATTTTACTATTTAAAAGTT |
| Cl179s      | CGAAGTGAGGGACAATTTGCCAAACGCAATTACCAACAGGCTCCTAGCC   |
| Cl181s      | GAGTCGGCGCTCACTCCACATCCTCCGAGCCTCGACGAGGTTTATG      |
| Cl182s      | CCGACTACGTTGTCGAGTCAAGCTCACTGTTGATTATATAGAGTAAA     |
| Cl183s      | CCCCGCACTGCAAAAAGTTCCGCCCCGAGATTGTGGACATTACCCCAAAGC |
| Cl185ds     | CCCGACGAACCTTAGCAAGAAAGGGGGCAAAGAACCCAAAGTGATATATCC |
| Cl189ds     | CCAAAGAACCTAAATCAAAGATTGAACTTAATATTTTTTAAAACACGAT   |
| Cl191s      | CATTTTAGAATCAAATCAATCCAACCCAATAACACACTCAACATTAATT   |
| Cl192ds     | CATTCACACTATAGAAAACACTTTTAAACGTCGGTTTTTTAGCACTTTTA  |

**Supplemental Table 3.** (continued)

| Marker name | Sequence information                                 |
|-------------|------------------------------------------------------|
| Cl194s      | CATGTAGCTATTAGGTACGTGGTATATAGGTTTTGACTAAGTGGGATAGA   |
| Cl195s      | CATGATTTGGGTGACAAGAAGTTGAAAAATTGCTTTTTATATTTGCATA    |
| Cl198s      | CATCTCAAAGGGTAAGGTGGGGTGTAGTTTCTGAAAAAGTTACTCTGT     |
| Cl199s      | CATACTACGGCCTACAGGTGCAGCTGCTACCACATTTTCAGTAAACGCTC   |
| Cl19s       | TTTGGGTCTTCTTATAGTGCATCTGTTAAATGTTGTTCCAGAACATAA     |
| Cl1s        | CATGCCAAGCTTTAGATACTGCCACCGCAAGGAAAGTGTACTGGTTGTT    |
| Cl202ds     | CAGATTAAGCCATTTATTTACTTCTTTTCAGCCCCATTTCTCTCTCTT     |
| Cl203s      | CAGAGTACCTTGAGATTCTTGCCAAAGTAAAGGTCATAGCTTTTGACAAG   |
| Cl204s      | CAAATCCCTAACACTAACAATCACACCCATTTTCCGCAGTTGCTGACTA    |
| Cl205s      | CAAGTATGGTGGGGAGAGTCCATCAGCAGCAAGAGTAATTTCAAATAA     |
| Cl207ds     | CAAACGGCGCATATATCATCGGATTGAGTTGGTCAGTGCTTTTGTTGTCG   |
| Cl208s      | CAAAAAGGCACTAGCTTTGCTAAAAATAATTCATCTCTACTAAGAAAAAG   |
| Cl211s      | ATTTAATCATATGAATATTC AATAGAAAAATAATGCTTTTGCGAGATTCCA |
| Cl216ds     | ATTCCAACAAAAATAAAAAAGAAAACAAAAACTAGTGAATAGTGTATGAA   |
| Cl217s      | ATTATGACCAAACTGATCTGAGACAATGGCCAAATAGCACATCTTAATG    |
| Cl219s      | ATTATATATGCAGCTTTTTTCTTTTATTGTA AAAATCTAAAAATCCATAG  |
| Cl21s       | TTTGAATGTTACAAA ACTGGGGA ACTGATTGATTACAGTTTCAATTATTG |
| Cl220s      | ATTAAGGTGTTAAGAAGTGTATGGTCATATTA AAAAAGTAAATTAATTTTA |
| Cl221s      | ATTAAGGGTCAAATAGACCTTCAA ACTATACTAAATGTGCAATTAGGCC   |
| Cl222s      | ATTAACAGAGTCATCATCACTTGT TTTGTGGCTGTGGATGTGGATGAGTAC |
| Cl223s      | ACCCCAAGCCTTCTACGCAGAAACAGTCTAATTTACTTCTGTAATTCATT   |
| Cl224s      | ATGGGCACATGCTCTAAGGACTTGATGTTTCTGGTACGTGTCCTTAATTG   |
| Cl229s      | ATCACCTCCCTTG TACCAATACTCCTTTGCCCTTATTTCCAGTGTGCTC   |
| Cl230s      | ATATTAAGCGGAGATTCTCTCTAATAAATGTACGGAGTAGTACTTATTA    |
| Cl231ds     | ATGTCTTTAAGGGCTGTCCAGGTCTGCCACGACCTATTCTCTATAGCCGGC  |
| Cl232s      | ATATATTCTTCTTTTTAAGGGATGAATTAATTTGAACCAAACTGCATGT    |
| Cl233ds     | TCCTATTGCTCCGCTCCGTCACCAGA ACTATCTCGGAGCACGTTCCAC    |
| Cl234ds     | ATATAACCCCTAAAAAATGGATCAGCTCAACAAAATATATATGGGGATCA   |
| Cl237s      | ATACCTAATTTCTGTTTCGATGTCGTCTGCACCTTACGGACATGGAGTAT   |
| Cl238s      | GTAACGAAATTCGTCCCAAGTTTCATGCCTGGCAATAGAGTATCTGTAGG   |
| Cl23s       | TGCCCAGGTTTCCGGACGAGGAAAAGGGCGATCACACGGGTAATGTCTGG   |
| Cl240s      | ATAACAACACCCCATTGCTTTCAAATTTCTTTAAAAATATTCTTTGTTTT   |
| Cl241s      | ATAAACACGGTATAATGAACATGAATTAACACTTAACATAATACACATA    |
| Cl242ds     | TAATCGACTTGAGGGCTATCTTCCACCAAGTCTAGGCTCTGTTCTTCAA    |
| Cl244s      | AGTTCAACGGAGTGTGACAGTGAGTCAGTGACTCAGTGGACTCGAGCCCG   |
| Cl245s      | AATGTTCTTAATTA AATTGACAGGATCAAGGGTCCAGATTGAGTGCAGAA  |
| Cl246s      | AGTATTTCCATGGAAAATGCTCGCACTGGCAGCTCAGTTATTTCTAGGC    |
| Cl248s      | AGGATAACCGTAAATGCAAAA CTGATAATTTTGAGGATGTCGGAATCTGT  |
| Cl252s      | AGAAGTACTCTACTGATAAAATAGATGAAGATTTCTTTTAGAAAATCTG    |
| Cl253s      | AGAACTAGTTTGCATATATAGTTACTCAATGATTCATACA ACTTTAAATT  |
| Cl254s      | AGAAAGACTGCTTAAATTAGAGCAAAGATCAGTAAGAATATATATGAACT   |
| Cl255s      | ATTTTAACTTCGAATGCACACAAATGTCGTATAGACAATGCGGCACAAC    |
| Cl256s      | ACCACTACAAAAGCTAGCATAAGAGGTATTATATTTCAAAGAGGCAACATA  |
| Cl258s      | ACTAAAACATGTCTCCTCATTACACTCATTCTTCGTACCTATGGACTT     |
| Cl262s      | ACATATATTTCAATCAGCAGGTATATATGATATGAGGGTAATTAATGAA    |
| Cl263s      | ACAATCCACTTTTAGTCCCTTCTTATTAGATCATCCTCATTTGGTTCTAG   |
| Cl264ds     | ACAAGTACGTACTTGCAAAAAACATGGGAAATGGGGAAGGCAATTTCCCTA  |
| Cl265ds     | ACA ACTTTTAAGCCAGCTTAGAGTCTCCCTCATACCACAGCTTCCACCA   |
| Cl266s      | ACAAATCCACCAATCAACTAATTAGTAATGCTATTATATTTCTCAGTCG    |
| Cl276s      | AAGCAAAGCTCCAGAGGAAGAGAGAGAGAGATGGCCACCGCAAGCACC     |
| Cl278s      | AAGATGTTGAAAGTAGTTTGGTAGAAACATCTCACATGTTATTTCAAACAA  |
| Cl280s      | AACTCAGCATGCTGCTACGTGGCTGGGAAATATGGGGGTCACATTCCATG   |
| Cl281s      | AACTATATATTTGGTTTAAAGTCCTAAAGCTTCCATTTATGCTACTGTAC   |
| Cl283s      | AACCCAATCACAAGATTGTTAAGATAATGGATCCAACACTCTTAGTGAAG   |
| Cl285s      | AAATGGAGGAGAATGCTTATGACCCAGAAGATTGCTCAACTTCCCCATG    |
| Cl286s      | AAAGTGAATACAGTAGAGAAAATAAAAAAATAACAGAGATTCCCTAAAGTC  |
| Cl287s      | AAAAAGCCATACTTGGGAGAGTTGGGTCATTGAGGAAAGCACATCAATAG   |
| Cl28ds      | CATTATACTTATTTTAGTTTATTTTCAATGTCTGGACTCTGGATCTTGAT   |
| Cl292s      | TTCTTCATTGGTGGAGAAAGCAAAATGCGAGGCCAGGCCTTCTTCAATC    |
| Cl295ds     | TTATCGTCTTTTTCATTGCATAAATTTCTCATAAATAAGTGAGTACGCGG   |

Supplemental Table 3. (continued)

| Marker name | Sequence information                                 |
|-------------|------------------------------------------------------|
| Cl296s      | TTATGCTCAAAGATTGCTTCTGCATACGGATTATAAAAGCTAAAACCTGT   |
| Cl297s      | TGAGGATGAAGGTGAATTATACTTCTTTCCTATCAACTCAAAGGTGGTGT   |
| Cl299s      | TCTGGTTTCTATGATTCTTGAAGATGTTTTCTTCTTTTCTTGATTGTATA   |
| Cl29s       | TTCCCTCACTTTTAATCTCTTGATTATATGCAGGTAACATAAACCATGGGTT |
| Cl300s      | TCCCTAAGCTTATATAGCCTTCAATCCTTCATTAAGGTTGATTTACGAAG   |
| Cl301s      | TCCAATAACCAGAAACACAAAACAGAGTAATTCAAACAAATAAAATCAAC   |
| Cl305s      | GTGTAAGGCCACAATTGGGCTTACAGTGAGCAGCGGAGTGGAGATAGGA    |
| Cl306s      | GGTTGAGTCTTTGTGAAAACCTCAAGCAACATAATGCCATAACTATACAT   |
| Cl307s      | GGTTATTGTGTTCTTAATTTCCGGTCTGTTATTAGGCGAATTGAATATC    |
| Cl308s      | GGTAGCTTGATGAATTTAACTTGAAGAATTTATGTGATGACTCCATATG    |
| Cl309s      | GGCAACGGTGCCATATTTGACAAAACTTTAATTCTTTAAAGATGATAAC    |
| Cl30s       | TTCCAGACTATACGAGCTGTTGTTTTCTTGCCACTCACAACTCTAGGA     |
| Cl311s      | GCCACAATGAGTTTCAATTTGGGCTCTGTTTATAGTGACAATTGCAGATA   |
| Cl312s      | GATTCTTCAATGGAACCCTAGTTCTCTCTCTCGGAACCAAGAAACGCT     |
| Cl313s      | GATGTAACCCGATCTTCTACTTCTCTGATCATAGTGCAGACACCCCTG     |
| Cl316s      | GAAGTGAACAAGAATCTAATCTTGTTCAAAGTGTAGATTGTTGTAATG     |
| Cl317s      | GAAATTACTCAAAAAAAAAAGGTCCAAATTGAGATATTGCACAAGGCC     |
| Cl319ds     | CTCAATTGCTCGCTCAAAATACCAGAGGATACCAATCTCCATAAAGCCCA   |
| Cl31s       | TTATTTGGAAGTATGGGTACTATATAAGTAAAAGCAGTTTGTATCATATA   |
| Cl321s      | CTAGGCTCTATAGCGTTATTGATCCATAAACTGTGTAAGATTATGAGCCT   |
| Cl323s      | CGTGGGCACCAAATTAAGAATCAAATTTCAATCTGTTTTGTTTTTCAA     |
| Cl325s      | CCTCTACACCAATGCAATAACTAGAGTCGAAGTCCCCTGTAGCTCAAT     |
| Cl327s      | CATTTGAATCGCGATCCGGCCCGACCCGACCCGCTCATGGTGAGACGGT    |
| Cl328s      | CATTGTGGGCACTGTAGGGTGGGGGCTTGGGATCTCTTTGAGGAATGCTG   |
| Cl329s      | CATTATCTTCTTTTCAATCTGGGAGGGAGTTGAAAGCCGCAAAACATGA    |
| Cl32s       | TTATGTTTATATTATGCTCAACAACACCTAAACGCCACATTTTCACAA     |
| Cl330s      | CAGCCAGCCAACAAAAGAGAGGAAAAGGAGACGATAGAGAAAAATAGATA   |
| Cl331s      | CAACATGCAATTTCTCATGTAGCTCCACTGATTTCTGGATTTTCACT      |
| Cl332s      | ATTCTAATAGGTGGTCACAAGATTGAACCCGCTGGTATGGGCATTGAAT    |
| Cl333s      | ATTAGAACTTGACCGCGCGCGGAAAATTATGGCGTGATTTGCAAATGA     |
| Cl334s      | ATATTTCAACTCCATCTTGAGAGCTTTTCTTAACTGGTAAAAAGTGGC     |
| Cl336s      | AATTGATTGCTCGGGAGGCTCATATCCATAGTCTTCTGTCAAAGATGAGG   |
| Cl340s      | GTTTATACATGCAAGAAATGAAATTGTATATATTTTTAAGAGTTTATTAC   |
| Cl342s      | GTGGCGGCAAGCGTGGGAGCAGTGGAGGCCTGAAAGACCAAGGCTTCGC    |
| Cl343s      | GATAGATGATGCATTAATCATAGTACAATTTTTTGTCAAGATGACCACAA   |
| Cl345s      | GAGAGTTTTCCCAACCAAAATGGGAAAAGTATCAGATATCATATTGTTCC   |
| Cl347s      | CATATTTGATCAGTATTACTCCCATGTTAATTTTTATATGTGCTTTA      |
| Cl349s      | CAATCATTCTAGTTTTTGGGAGGCTCAATGCACCACTCTTCCAGCTATAC   |
| Cl34s       | TTAGGGATAGCTGTTGGAGGCAAAATATGCCACCTGACCATCCGCTTAAT   |
| Cl350s      | ATTCATTGTGTAATAGTCGCTGGTATTGACGCCATCATTAGGCCTGGGTG   |
| Cl352s      | ATAATTTTGGTGCTAGCTATCTTTCTTTTTTTTTTTTTTTTAAATTAAC    |
| Cl353s      | ACCCTTATATGTCATCACCTTGAAGCGTTCCAAGCAACGCAAGCCTGTCA   |
| Cl355s      | AAAAATGTATTAGGGCTTTGCCTTAGTTTTGCTTATATATTTGGGTGGAA   |
| Cl358s      | TATGTTATATATATGTTTTGTCTTGGTGGATGAGGCACGCATGCTTATGA   |
| Cl359s      | ATATGAACCTTATCAATAGTCGATCTATCGTCACTCTTGAGTCTCAAGCTT  |
| Cl35ds      | ATAGGGACATGCTTAATATGCACATATCATAATGCCTAATATGTCACAGA   |
| Cl361s      | TTAGAGCAACCCATCAGTAAAAAACTTCCCTGAGTTTTTTTTTTGTTAGCA  |
| Cl362s      | GTTAACCCATATTTTCGGCCACATTGTGAAAATAGTACAATTTTTTTTTTA  |
| Cl363ds     | GGCTGGTGGCTCAGAGATCACAGCCAACCCGCGGGGACGAATAAAAACT    |
| Cl365s      | GAATCCCAATGAAAGTCATGTGTTACTTGAAAAGGCACTTTTATATT      |
| Cl366s      | CTATTTTTTAAATTTACAAGAAAATATGTTGTCGCTATTGAAAAGTGAG    |
| Cl367s      | CATTATACTTATTTTAGTTTATACTTATATATAATGTAACAGTGCCTCGC   |
| Cl375s      | GAATTAATTTATAGTCTATTTAGGTAGACTATATCTTTATATTTATCTT    |
| Cl376s      | CATTCAATATACAAAATATACCTCCTCTGAATACAATGTATATTTTAA     |
| Cl377s      | ATATATAGTGGAGTATAAGACTCATCATAATCATAATCATAAATAGAAAT   |
| Cl378s      | ATAATGTGGTGCACATGAGTTCTAGTGTAATTGTTGGTGAGGACTATACT   |
| Cl379s      | AGGTGGACCTCGGTTTATGTTATAATTTGAAAAAAAAAAAAATACTACGTG  |
| Cl380ds     | TTGATGCTAATGGCCACCCTCTCAGAGTGACAAAGATACTGAGGAGCTG    |
| Cl382s      | TTCTTCAATTTCTGTATAGGTAATTAATAATACGTATTATTCACAATTC    |
| Cl383s      | TCTAGAACTATACCACTGTTGTTATATTTTTATATATTAATTTATCGACT   |

**Supplemental Table 3.** (continued)

| Marker name | Sequence information                                  |
|-------------|-------------------------------------------------------|
| Cl384s      | ATATGTATAGTCATACCAACTTTTTTTAAAGTGAGCAAACCTGTTTAATAT   |
| Cl386s      | TGTTGCATAAAGTGGGGGGGGGGGCATGTACAAGTTTGAGGGTAAACACTT   |
| Cl387s      | TATATAAAGTAAGTTGACCCCGCTATATTTTTATGTTTTTTTTTAAAAAA    |
| Cl392s      | AATGACTTCTGGAAAATAATTTCTGGAAAATGAGTCATTTTCCGGAAAAAT   |
| Cl39s       | TGTTCAAGTGAGTCTACCTCTCCTTATGGGTTTGATGAACAAATTTAGA     |
| Cl3s        | CCAAACGTTCAATCCCCTCATCACTCACCCCTCAAGCATCCATGATACA     |
| Cl40s       | TGTTACATTAGAAAAGTAAAATTAGAAAATAAAAATTTGGGAATTCATAGAG  |
| Cl41s       | TGTTACACAAGAGAGATGCAAAAGTTTTAAGAAACTCACAACATTTCTAGT   |
| Cl42s       | TGTTAAGCGTTCATTAATGTTTCGTTAACGTTTCGTGGACACGTTTCATGAAT |
| Cl46s       | TGGACCGCGGTCCACAATGCATTGTGGATCGCGATCCCCAAAACGACGTC    |
| Cl49s       | TGAGCAAGCTAATTCACATAATCGTGAATGTAGCGACAAAAACAACTTTGA   |
| Cl4ds       | AAACCAAATGCTGTTTTCAGATTAGACAATCTTCTAGCCCTAAAACCTCTGC  |
| Cl52s       | TGAAGATGCTCGGCTGATGAGGTCAGCTTTCCCGGACAATGGTGCACAAA    |
| Cl53s       | TGAACTAATTACTTAAAATGCATTGATGAAGAGAGATAGGGGACATGGAA    |
| Cl54s       | TAAAAACACTAGTCTTGTTTTGTTGTTGCAGATGAACATGATTTCTTGAA    |
| Cl56ds      | TCTTGTTGATGACAAAATCAAGTACTCGTAATTTGAGAAGTTCCAAAAC     |
| Cl58s       | TCTCAGCCGTGCGAAAAAGATTCTCCGCCCGTCAGGAAGAGGAAAAGTGGAA  |
| Cl63s       | TCCTCCAACATAAAGGAAGACATACAATTTTTGGGTGGACCACCCCTGT     |
| Cl64s       | TCCATCACTTGTATATATAATCTTTTTTTGGAATGAAATGGTGGAAAT      |
| Cl69s       | TCAACCACTGGGTGTTTCGGAGTTCACCATAATTGTTGAAATGCGCGG      |
| Cl6s        | AAACACGCATTGCTCGAAAAGTACGTAGTTAACTTTACTAGTTGGGAGAAA   |
| Cl70s       | TATTTGCTCCTGAAGATCAATCTCATATATTTGCAGGCTATATGTAATCA    |
| Cl73ds      | TATGCATCACAAGATTGTGTTCAAGACTGCAAAACAATTTTATATACCTTT   |
| Cl75s       | TATGATTCAAAAATGGTAGCCAATGGAGGGATTTGTACCAGGATGAATT     |
| Cl76s       | TATATCACTCTGATCTTTTGCATTTTCAGGCAGAGAAAATGGAGCTCC      |
| Cl77ds      | TATATAAACATAAATGTGCACTAATCTAATCGCTTTTAGTTAAATGGAGC    |
| Cl79s       | TATAAATCATAGATAGAAAAATTGTGGTGTATGTGGAAGCCGTATTTCGTA   |
| Cl81s       | TAGCTATCATAAAAGAGTATAAAGTCATTGTTATTGTTTGGTTGACAGGT    |
| Cl82s       | TAGATGTATTTCGAGTTGCATCAATTAGTCCTTAGAGTTCATGAAAATGT    |
| Cl83s       | TAGATGATAAGTCTGTTGAAACTCCTTTTTCTTCTCCATTCAACAATGCA    |
| Cl87ds      | GAATGAACACTTGACGTTTTAGCGTTTACAACGTAAAGTTCCAACATAAG    |
| Cl89s       | GTTTTTTTCTTGGGGGTTCCCTCACCTGCTACTAGTTCAAATAAGTACAGT   |
| Cl93s       | GTTTCCTTAATCTGCGAGACAATTTAAGCAATAACATAAAGATATCCAC     |
| Cl94s       | GTTTCATATATTTCTTTGACAAAAGTGCTTTCACAAATCACATCCGTTT     |
| Cl95s       | ATTTCATAAATTGGAGAGAATTACAATCCATCGAATAAAATCCCAGAATT    |
| Cl98s       | ATTGGTATCAGAATAAGGGTGGTTAAATCTTTAGAGAAAATGGTGTGG      |
| Cl9s        | AAAACCTCCTAAAAGTGAACAGTATACCTGAAAATAAAGGTTGCATAATG    |
| pattern383s | AATAAATAATAAAAGCACACAATAAGTTACCAATTAATTAATCAACTAAT    |
| pattern386s | ATGACTTTTATTAAGATTACACACAATTTTATAATTATTACAAGTATTC     |
| pattern395s | CTCCTCAATAGTAAAATTGTTTAATCTACAAGATGCTCTCATTGCAACT     |
| pattern396s | ACAGAGTGTATATAATTAATTGGAAAAGTGCATGGATAATGGATTGATT     |
| pattern397s | ATTTTTAGTTTGGCCTGATTTAGGAAACACACATTTATATTATATACTAA    |
| pattern398s | ATGCTTCTATTTAAATATTTTATCCAAACAATCTTAACTATTTTAAAA      |
| pattern411s | ATAATTTTAAAATATTTTTTCAAACCTTTTAAATATTTTTTAAATAATCCA   |

The description of 's' and 'ds' represents simplex and double-simplex markers, respectively.

**Supplemental Table 4.** Summary of marker information per linkage group

| Linkage groups | No. of markers | Length of linkage groups (cM) | Average distance between markers (cM) | Linkage groups | No. of markers | Length of linkage groups (cM) | Average distance between markers (cM) |
|----------------|----------------|-------------------------------|---------------------------------------|----------------|----------------|-------------------------------|---------------------------------------|
| P01            | 8              | 91.7                          | 11.5                                  | I03            | 3              | 1.9                           | 0.6                                   |
| P02            | 4              | 6.8                           | 1.7                                   | I04            | 3              | 9.7                           | 3.2                                   |
| P03            | 3              | 2.1                           | 0.7                                   | I05            | 2              | 21.7                          | 10.9                                  |
| P04_1          | 3              | 15.9                          | 5.3                                   | I06            | 2              | 1.1                           | 0.6                                   |
| P04_2          | 3              | 15.3                          | 5.1                                   | I07            | 2              | 13.6                          | 6.8                                   |
| P05            | 3              | 24.2                          | 8.1                                   | I08*           | 2              | 0.0                           | 0.0                                   |
| P06            | 2              | 1.1                           | 0.6                                   | I09            | 3              | 1.1                           | 0.4                                   |
| P07            | 3              | 22.5                          | 7.5                                   | I10            | 2              | 11.2                          | 5.6                                   |
| P08            | 2              | 0.1                           | 0.1                                   | I11            | 3              | 7.5                           | 2.5                                   |
| P09            | 3              | 1.1                           | 0.4                                   | I12            | 2              | 5.4                           | 2.7                                   |
| P10            | 2              | 7.9                           | 4.0                                   | I13            | 4              | 46.4                          | 11.6                                  |
| P11            | 2              | 10.0                          | 5.0                                   | I14            | 3              | 1.5                           | 0.5                                   |
| P12            | 2              | 14.0                          | 7.0                                   | I15            | 2              | 14.0                          | 7.0                                   |
| P13            | 6              | 47.3                          | 7.9                                   | I16*           | 2              | 0.0                           | 0.0                                   |
| P14            | 4              | 46.0                          | 11.5                                  | I17            | 2              | 21.3                          | 10.7                                  |
| P15            | 2              | 3.2                           | 1.6                                   | I18            | 3              | 25.1                          | 8.4                                   |
| P16            | 3              | 4.2                           | 1.4                                   | I19            | 2              | 7.7                           | 3.9                                   |
| P17            | 4              | 48.6                          | 12.2                                  | I20            | 3              | 23.1                          | 7.7                                   |
| P18            | 3              | 30.8                          | 10.3                                  | I21            | 3              | 21.4                          | 7.1                                   |
| P19            | 4              | 19.1                          | 4.8                                   | I22            | 2              | 10.1                          | 5.1                                   |
| P20            | 4              | 50.7                          | 12.7                                  | I23            | 5              | 32.4                          | 6.5                                   |
| P21            | 4              | 52.5                          | 13.1                                  | I24            | 4              | 25.1                          | 6.3                                   |
| P22            | 2              | 3.2                           | 1.6                                   | I25            | 2              | 14.0                          | 7.0                                   |
| P23            | 3              | 32.2                          | 10.7                                  | I26            | 2              | 29.8                          | 14.9                                  |
| P24            | 2              | 10.1                          | 5.1                                   | I27            | 5              | 62.1                          | 12.4                                  |
| P25            | 2              | 28.0                          | 14.0                                  | I28            | 2              | 2.1                           | 1.1                                   |
| P26            | 3              | 15.9                          | 5.3                                   | I29            | 4              | 16.2                          | 4.1                                   |
| P27            | 2              | 33.6                          | 16.8                                  | I30            | 4              | 24.8                          | 6.2                                   |
| P28            | 2              | 2.7                           | 1.4                                   | I31            | 3              | 20.8                          | 6.9                                   |
| P29            | 2              | 1.0                           | 0.5                                   | I32            | 2              | 10.1                          | 5.1                                   |
| P30            | 2              | 3.2                           | 1.6                                   | I33            | 2              | 21.3                          | 10.7                                  |
| P31            | 2              | 26.2                          | 13.1                                  | I34            | 2              | 19.8                          | 9.9                                   |
| P32            | 2              | 1.0                           | 0.5                                   | I35            | 2              | 5.4                           | 2.7                                   |
| P33            | 2              | 8.9                           | 4.5                                   | I36            | 2              | 11.4                          | 5.7                                   |
| P34            | 2              | 6.7                           | 3.4                                   | I37            | 4              | 18.2                          | 4.6                                   |
| P35            | 5              | 86.9                          | 17.4                                  | I38            | 3              | 28.8                          | 9.6                                   |
| P36            | 2              | 2.1                           | 1.1                                   | I39*           | 2              | 0.0                           | 0.0                                   |
| P37            | 2              | 31.7                          | 15.9                                  | I40            | 3              | 44.3                          | 14.8                                  |
| P38            | 2              | 19.8                          | 9.9                                   | I41            | 2              | 4.3                           | 2.2                                   |
| P39*           | 2              | 0.0                           | 0.0                                   | I42            | 2              | 19.8                          | 9.9                                   |
| P40            | 2              | 22.9                          | 11.5                                  | I43            | 2              | 14.0                          | 7.0                                   |
| P41            | 2              | 28.0                          | 14.0                                  | I44            | 2              | 2.1                           | 1.1                                   |
| P42            | 2              | 10.6                          | 5.3                                   | I45            | 2              | 4.3                           | 2.2                                   |
| P43            | 2              | 31.7                          | 15.9                                  | I46            | 2              | 3.9                           | 2.0                                   |
| I01            | 2              | 12.9                          | 6.5                                   | I47            | 2              | 35.7                          | 17.9                                  |
| I02            | 3              | 6.9                           | 2.3                                   |                |                |                               |                                       |

\*Although the linkage groups with this length contain more than two independent markers, the recombination were not observed in our F<sub>1</sub> mapping populations. Thus, the markers in these linkage groups were considered to be closely linked.
